# Supplementary material for: Pain Severity Correlates With Biopsy-Mediated Colonic Afferent Activation But Not Psychological Scores in Patients With IBS-D
Source: PubMed Central journal article supplement — Clin Transl Gastroenterol. 2021 Feb 22;12(2):e00313. doi: 10.14309/ctg.0000000000000313 (PMC7901800; doi:10.14309/ctg.0000000000000313), 2021-02-22
Supplement: ct9-12-e00313-s004.pdf [file ct9-12-e00313-s004.pdf]

Supplemental Figure 1

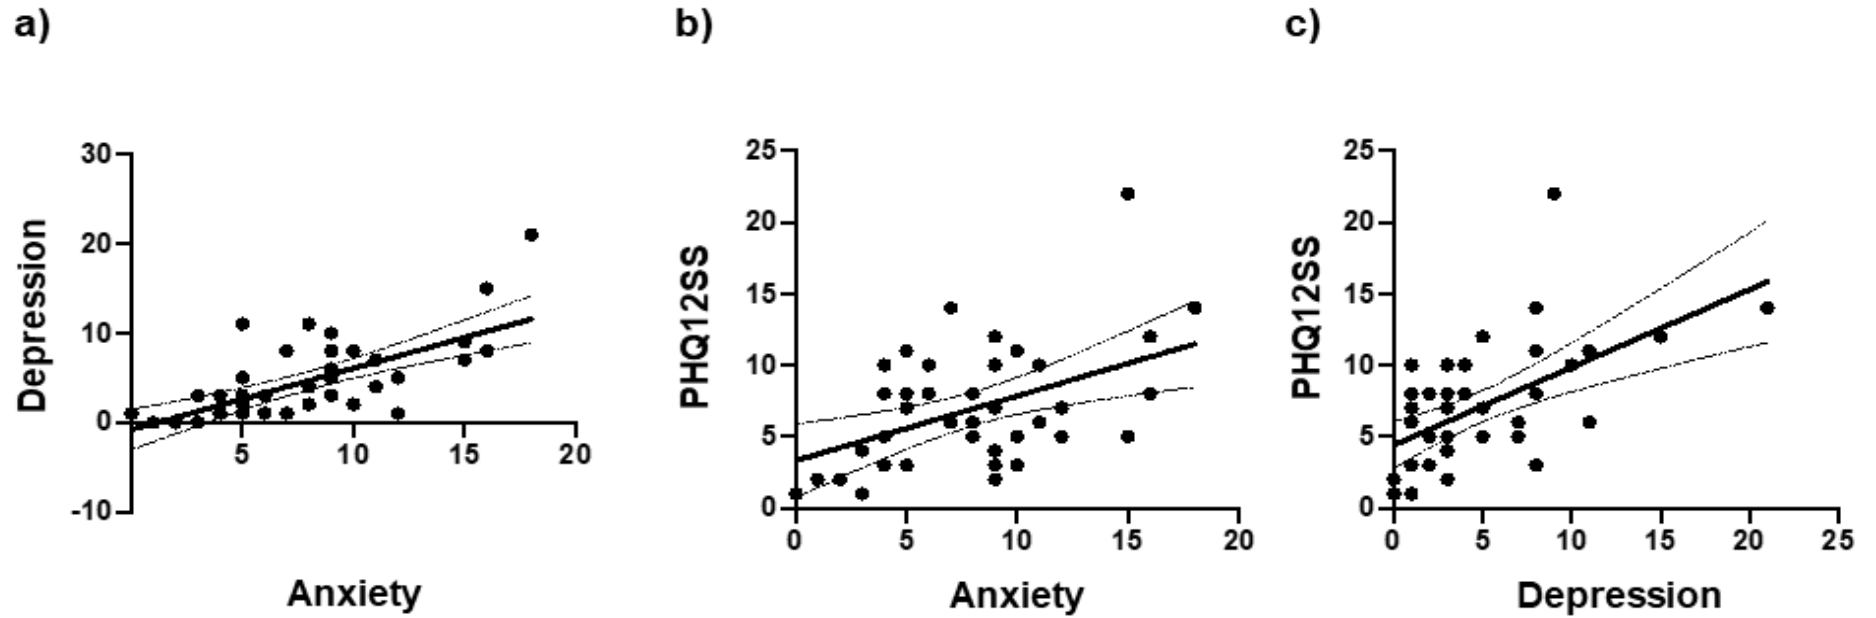

Figure S1. Scatter plots of data for individual patients illustrating the respective correlations between symptoms scores for anxiety, depression and PHQ12SS
